# Supplementary material
Source: PubMed Central journal article supplement (PMC8243722)
Supplement: NIHMS1690338-supplement-Supplementary_Figures.pdf [file NIHMS1690338-supplement-Supplementary_Figures.pdf]

## Supplementary Figures

Jalali, *et al.* **POT1 regulates proliferation and confers sexual dimorphism in glioma**

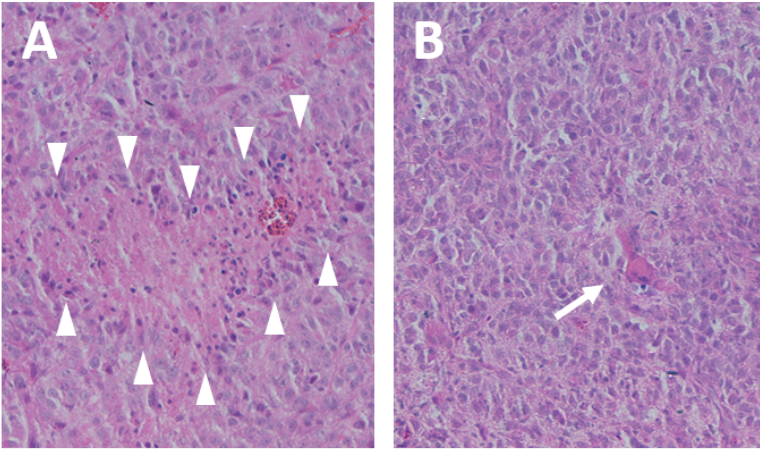

**Supplementary Figure 1. C5 glioma tumors share the aggressive histological features of C3 tumors.**

(A) H&E section of C5 tumors showing an area of necrosis surrounded by pseudopalisading tumor cells (arrowheads). (B) H&E section of C5 tumors showing an area of vascular endothelial proliferation (arrow). C3 tumors contain knockouts of Trp53, Nf1, and Pten. C5 tumors contain additional knockouts of Pot1a and Pot1b.

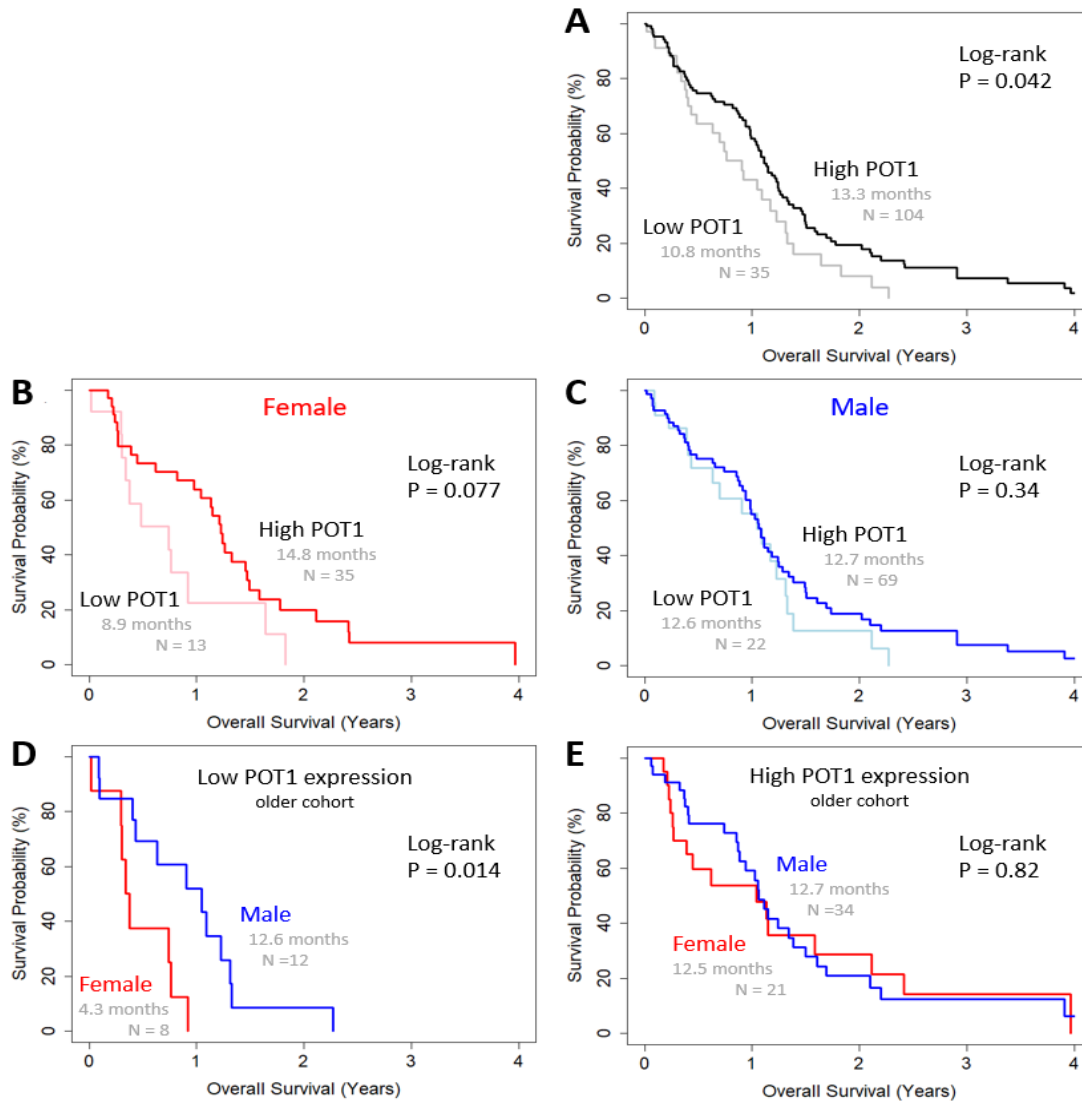

**Supplementary Figure 2. Kaplan-Meier Survival Analysis of Grade IV IDH-Wildtype**

**Glioma (Glioblastoma)**

(A) Kaplan-Meier plot showing a lower median survival in glioma patients with low POT1 expression tumors. (B-C) Female patients with low POT1 expression tumors have a more drastic reduction in survival. (D-E) In the older cohort (>61 years old), female patients with low POT1 expressing tumors have a shorter survival than males while the survival of patients with high POT1 expressing tumors is not sex-dependent.

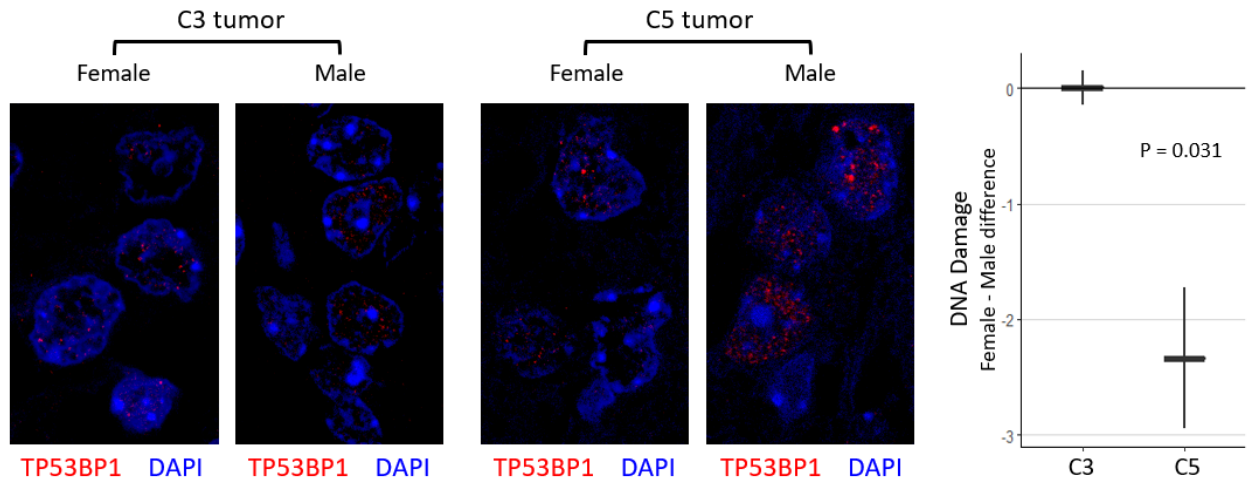

**Supplementary Figure 3. Loss of POT1 in mouse glioma has sex-dependent**

**effects on DNA damage.** IHC signal from TP53BP1, a marker of DNA double-strand

break, was used as a surrogate for DNA damage. Quantification of the results show that

female-male difference in DNA damage is lower in C5 tumors. Plots show mean  $\pm$

standard error, and units are arbitrary. C3 tumors contain knockouts of Trp53, Nf1, and

Pten. C5 tumors contain additional knockouts of Pot1a and Pot1b.

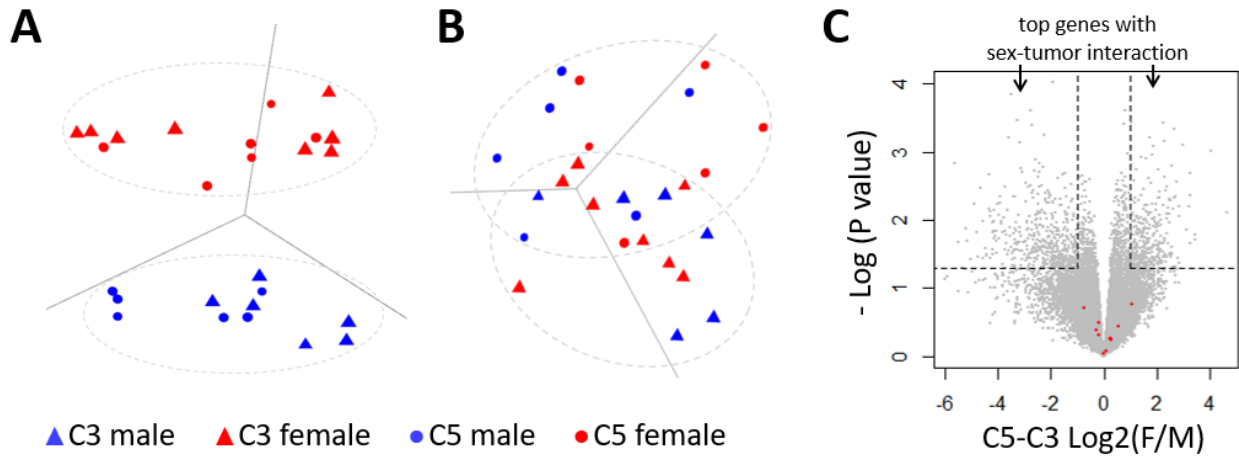

**Supplementary Figure 4. Analysis of RNA Sequencing Transcriptomic Data from**

**C3 and C5 Tumors** (A) RNA sequencing of C3 and C5 tumor samples and 3D Principal

Component Analysis (PCA) using the 300 most variable genes shows clear separation

of samples by sex. (B) 3D-PCA using the next 1000 most variable genes shows

overlapping clusters based on tumor type. (C) Volcano plot for sex-tumor interaction.

Log<sub>2</sub>(F/M): Log<sub>2</sub>(female/male gene expression ratio). Dashed lines demarcate top

genes with sex-tumor interaction. Genes on the Y chromosome, which have a fully sex-  
dependent expression, are marked in red, showing no significant sex-tumor interaction.

C3 tumors contain knockouts of Trp53, Nf1, and Pten. C5 tumors contain additional  
knockouts of Pot1a and Pot1b.

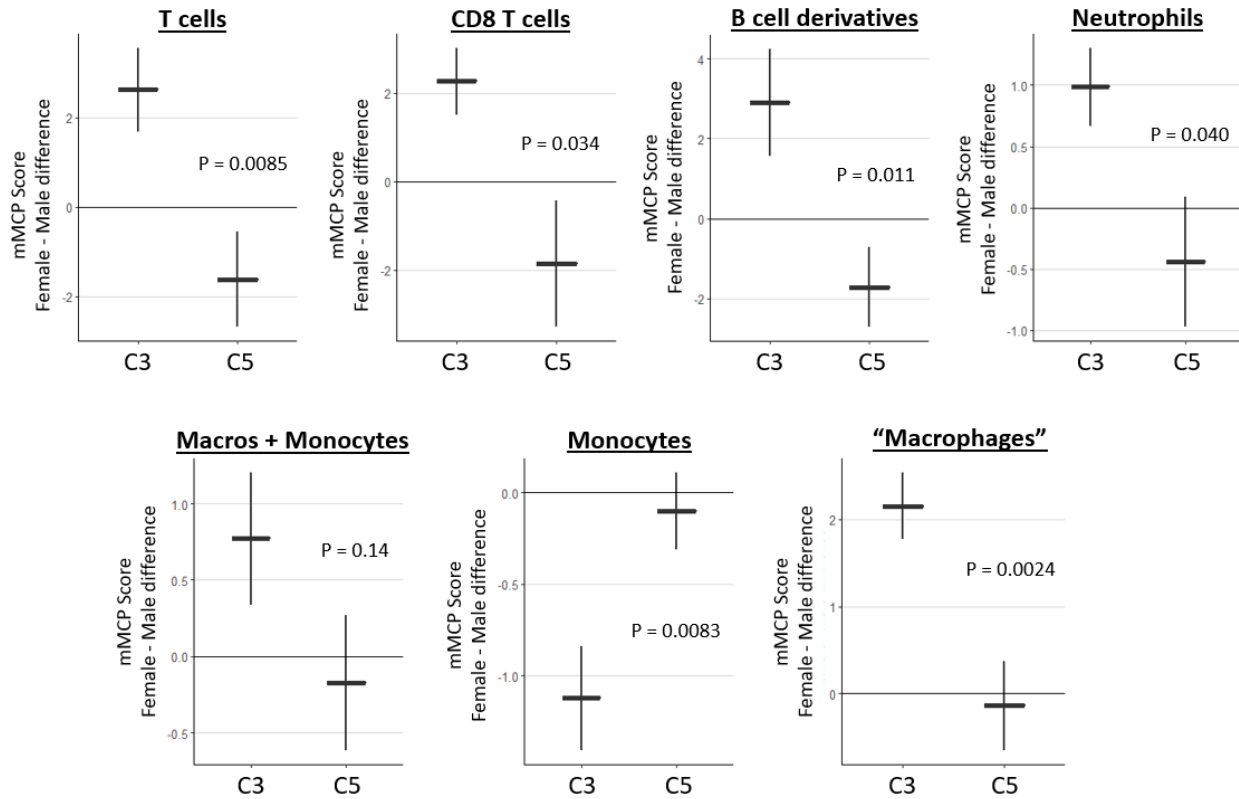

**Supplementary Figure 5. Sex-dependent effects of Pot1a/b loss on different**

**immune cell lineages** mMCP-counter analysis on RNA sequencing data from C3 and

C5 tumors confirms previous immune findings. There is a general decrease in female-

male difference in immune infiltration of tumors as a result of Pot1a/b loss. However,

Monocytes, generally immune-suppressive, show an increase in female-male

difference. "Macrophages" refers to the score difference between

Macrophages/Monocytes and Monocytes. C3 tumors contain knockouts of Trp53, Nf1,

and Pten. C5 tumors contain additional knockouts of Pot1a and Pot1b.
